# Supplementary material
Source: PubMed Central journal article supplement (PMC2639586)
Supplement: ddn196_1.pdf [file ddn196_1.pdf]

Supplemental Table 1. Association results in sample set 1

| RS Number  | Gene    | Position and alleles <sup>a</sup> | Case <sup>b</sup> |     |     |                  | Control <sup>b</sup> |     |     |                  | P <sub>allelic</sub> | P <sub>genotypic</sub> |
|------------|---------|-----------------------------------|-------------------|-----|-----|------------------|----------------------|-----|-----|------------------|----------------------|------------------------|
|            |         |                                   | 11                | 12  | 22  | HWE <sup>c</sup> | 11                   | 12  | 22  | HWE <sup>c</sup> |                      |                        |
| rs12656759 |         | C131395509T                       | 98                | 237 | 126 | 0.51             | 99                   | 240 | 120 | 0.35             | 0.75                 | 0.92                   |
| rs2073506  |         | T131422637C                       | 4                 | 63  | 394 | 0.33             | 2                    | 71  | 386 | 0.76             | 0.71                 | 0.55                   |
| rs31481    | IL3     | A131425101G                       | 13                | 107 | 339 | 0.19             | 12                   | 120 | 325 | 0.86             | 0.45                 | 0.59                   |
| rs11575022 |         | C131429914A                       | 2                 | 43  | 416 | 0.33             | 7                    | 42  | 410 | 0.0006           | 0.35                 | 0.23                   |
| rs2069626  | CSF2    | G131438678A                       | 0                 | 15  | 446 | 1                | 0                    | 9   | 450 | 1                | 0.22                 |                        |
| rs743564   | CSF2    | C131438778T                       | 76                | 228 | 155 | 0.63             | 72                   | 222 | 165 | 0.92             | 0.51                 | 0.78                   |
| rs25882    | CSF2    | C131439359T                       | 18                | 142 | 298 | 0.88             | 19                   | 150 | 290 | 1                | 0.57                 | 0.84                   |
| rs25887    |         | C131443960A                       | 83                | 232 | 146 | 0.64             | 87                   | 223 | 149 | 0.85             | 0.96                 | 0.86                   |
| rs25888    |         | A131444345G                       | 0                 | 25  | 436 | 1                | 0                    | 21  | 438 | 1                | 0.56                 |                        |
| rs31467    |         | C131464737T                       | 106               | 233 | 122 | 0.85             | 116                  | 227 | 116 | 0.85             | 0.46                 | 0.71                   |
| rs39897    |         | C131464795T                       | 96                | 235 | 130 | 0.64             | 93                   | 239 | 127 | 0.35             | 0.96                 | 0.95                   |
| rs154735   |         | A131465431G                       | 2                 | 56  | 402 | 1                | 1                    | 56  | 402 | 1                | 0.86                 | 0.86                   |
| rs247008   |         | A131475003G                       | 42                | 198 | 221 | 0.91             | 41                   | 213 | 205 | 0.20             | 0.47                 | 0.56                   |
| rs156055   |         | A131528076G                       | 4                 | 65  | 390 | 0.51             | 3                    | 64  | 391 | 0.74             | 0.80                 | 0.93                   |
| rs156033   |         | T131555220C                       | 12                | 126 | 323 | 1                | 11                   | 131 | 317 | 0.74             | 0.82                 | 0.91                   |
| rs2278398  | P4HA2   | G131558340A                       | 100               | 244 | 117 | 0.23             | 97                   | 229 | 132 | 0.93             | 0.40                 | 0.49                   |
| rs156030   | P4HA2   | A131558816G                       | 0                 | 49  | 411 | 0.63             | 2                    | 33  | 424 | 0.16             | 0.19                 |                        |
| rs152050   |         | T131564725C                       | 52                | 215 | 193 | 0.54             | 54                   | 217 | 186 | 0.48             | 0.69                 | 0.92                   |
| rs10520127 | P4HA2   | T131567154C                       | 2                 | 64  | 394 | 1                | 3                    | 68  | 387 | 1                | 0.58                 | 0.83                   |
| rs17618604 | P4HA2   | T131570083C                       | 9                 | 84  | 368 | 0.15             | 2                    | 112 | 345 | 0.02             | 0.30                 | 0.01                   |
| rs283763   | P4HA2   | T131581144A                       | 14                | 159 | 288 | 0.19             | 16                   | 162 | 281 | 0.26             | 0.65                 | 0.89                   |
| rs7733814  | P4HA2   | T131584208C                       | 2                 | 59  | 400 | 1                | 1                    | 55  | 401 | 1                | 0.60                 | 0.81                   |
| rs157578   | P4HA2   | C131589221G                       | 3                 | 102 | 356 | 0.18             | 12                   | 108 | 339 | 0.34             | 0.09                 | 0.04                   |
| rs10036208 |         | T131599222C                       | 48                | 206 | 207 | 0.83             | 62                   | 186 | 211 | 0.05             | 0.64                 | 0.24                   |
| rs11749843 |         | A131600397G                       | 0                 | 8   | 452 | 1                | 0                    | 5   | 454 | 1                | 0.41                 |                        |
| rs2405271  |         | C131601292G                       | 11                | 151 | 299 | 0.13             | 19                   | 138 | 302 | 0.55             | 0.82                 | 0.26                   |
| rs334902   |         | C131614458G                       | 78                | 244 | 139 | 0.11             | 101                  | 207 | 151 | 0.06             | 0.61                 | 0.04                   |
| rs4594848  |         | A131614497C                       | 94                | 247 | 120 | 0.13             | 107                  | 208 | 143 | 0.07             | 0.63                 | 0.05                   |
| rs7727038  |         | C131618156T                       | 86                | 226 | 149 | 1                | 98                   | 214 | 147 | 0.22             | 0.52                 | 0.57                   |
| rs162881   | PDLIM4  | G131636693T                       | 4                 | 73  | 383 | 0.77             | 5                    | 85  | 369 | 1                | 0.26                 | 0.54                   |
| rs162896   |         | T131640775C                       | 0                 | 33  | 427 | 1                | 0                    | 20  | 439 | 1                | 0.07                 |                        |
| rs7737937  |         | A131642880G                       | 10                | 125 | 325 | 0.73             | 8                    | 118 | 333 | 0.71             | 0.49                 | 0.77                   |
| rs162899   |         | G131643492A                       | 26                | 175 | 260 | 0.71             | 25                   | 178 | 254 | 0.45             | 0.87                 | 0.95                   |
| rs272895   |         | G131644273A                       | 6                 | 114 | 341 | 0.43             | 6                    | 101 | 352 | 0.83             | 0.39                 | 0.63                   |
| rs381870   |         | T131650200A                       | 11                | 146 | 304 | 0.21             | 18                   | 142 | 299 | 0.77             | 0.52                 | 0.41                   |
| rs162892   |         | A131651149G                       | 47                | 210 | 203 | 0.53             | 48                   | 194 | 216 | 0.67             | 0.53                 | 0.59                   |
| rs162889   |         | T131652285C                       | 18                | 191 | 252 | 0.02             | 22                   | 177 | 260 | 0.31             | 0.78                 | 0.59                   |
| rs2662314  |         | T131653068C                       | 7                 | 115 | 338 | 0.56             | 7                    | 107 | 344 | 0.84             | 0.61                 | 0.85                   |
| rs157572   |         | C131654011G                       | 39                | 204 | 218 | 0.44             | 38                   | 187 | 234 | 0.91             | 0.36                 | 0.52                   |
| rs3792876  | SLC22A4 | T131665208C                       | 4                 | 62  | 394 | 0.32             | 3                    | 60  | 396 | 0.72             | 0.73                 | 0.92                   |
| rs3792884  | SLC22A4 | G131679160A                       | 5                 | 90  | 361 | 1                | 3                    | 90  | 361 | 0.45             | 0.79                 | 0.78                   |
| rs11739484 | SLC22A4 | G131684659A                       | 0                 | 25  | 436 | 1                | 0                    | 23  | 436 | 1                | 0.78                 |                        |
| rs273912   | SLC22A4 | G131689248T                       | 37                | 186 | 238 | 0.91             | 50                   | 179 | 230 | 0.10             | 0.30                 | 0.33                   |
| rs272879   | SLC22A4 | C131698445G                       | 61                | 211 | 189 | 0.84             | 69                   | 209 | 181 | 0.49             | 0.45                 | 0.72                   |

Supplemental Table 1 (continued)

| RS Number              | Gene      | Position and alleles <sup>a</sup> | Case <sup>b</sup> |     |     |                  | Control <sup>b</sup> |     |     |                  | P <sub>allelic</sub> | P <sub>genotypic</sub> |
|------------------------|-----------|-----------------------------------|-------------------|-----|-----|------------------|----------------------|-----|-----|------------------|----------------------|------------------------|
|                        |           |                                   | 11                | 12  | 22  | HWE <sup>c</sup> | 11                   | 12  | 22  | HWE <sup>c</sup> |                      |                        |
| rs11568506             | SLC22A4   | A131699359G                       | 0                 | 12  | 449 | 1                | 0                    | 27  | 430 | 1                | 0.01                 |                        |
| rs17622208             | SLC22A5   | A131744949G                       | 97                | 252 | 112 | 0.05             | 114                  | 208 | 137 | 0.05             | 0.71                 | 0.02                   |
| rs7731390              | SLC22A5   | G131749648C                       | 0                 | 47  | 413 | 0.62             | 1                    | 38  | 420 | 0.59             | 0.45                 |                        |
| rs17689550             | SLC22A5   | T131750964C                       | 5                 | 86  | 370 | 1                | 6                    | 96  | 356 | 1                | 0.35                 | 0.64                   |
| rs35306350             | SLC22A5   | T131751187C                       | 81                | 253 | 125 | 0.02             | 102                  | 213 | 143 | 0.19             | 0.89                 | 0.03                   |
| rs274549               | SLC22A5   | A131757017C                       | 13                | 140 | 307 | 0.64             | 7                    | 135 | 317 | 0.09             | 0.30                 | 0.36                   |
| rs11739135             |           | C131761296G                       | 79                | 214 | 167 | 0.50             | 79                   | 216 | 161 | 0.70             | 0.80                 | 0.95                   |
| rs6596075              |           | G131770127C                       | 13                | 140 | 307 | 0.64             | 7                    | 135 | 317 | 0.09             | 0.30                 | 0.36                   |
| rs4705943              | LOC441108 | G131782903A                       | 6                 | 87  | 368 | 0.63             | 7                    | 80  | 372 | 0.30             | 0.73                 | 0.83                   |
| rs4705944              | LOC441108 | A131783163T                       | 1                 | 31  | 429 | 0.45             | 3                    | 26  | 430 | 0.01             | 0.91                 | 0.50                   |
| rs2285673              | LOC441108 | T131783868C                       | 25                | 183 | 252 | 0.32             | 25                   | 178 | 255 | 0.45             | 0.83                 | 0.96                   |
| rs1004234              | LOC441108 | A131785000G                       | 2                 | 56  | 401 | 1                | 0                    | 54  | 405 | 0.39             | 0.56                 |                        |
| rs11958162             | LOC441108 | A131799815T                       | 8                 | 105 | 348 | 1                | 3                    | 107 | 349 | 0.13             | 0.60                 | 0.31                   |
| rs4540166              | LOC441108 | T131807756C                       | 19                | 164 | 277 | 0.50             | 22                   | 158 | 279 | 1                | 0.96                 | 0.85                   |
| rs7713818              | LOC441108 | T131816650C                       | 45                | 201 | 213 | 0.91             | 46                   | 216 | 197 | 0.25             | 0.40                 | 0.56                   |
| rs10477741             | LOC441108 | G131823209T                       | 7                 | 94  | 358 | 0.82             | 5                    | 95  | 359 | 0.82             | 0.83                 | 0.85                   |
| rs6894249              | LOC441108 | G131825446A                       | 64                | 231 | 166 | 0.28             | 59                   | 230 | 169 | 0.20             | 0.68                 | 0.89                   |
| rs2522051              | LOC441108 | C131825477T                       | 81                | 241 | 136 | 0.16             | 108                  | 208 | 143 | 0.06             | 0.35                 | 0.04                   |
| rs10077785             |           | T131829057C                       | 20                | 164 | 277 | 0.59             | 19                   | 163 | 277 | 0.50             | 0.90                 | 0.99                   |
| rs2522057              |           | G131829846C                       | 79                | 237 | 145 | 0.34             | 79                   | 222 | 157 | 1                | 0.56                 | 0.62                   |
| rs2522064              |           | A131834387G                       | 10                | 147 | 304 | 0.12             | 20                   | 148 | 290 | 0.89             | 0.19                 | 0.16                   |
| rs17715481             |           | G131843283A                       | 1                 | 67  | 393 | 0.50             | 0                    | 77  | 382 | 0.06             | 0.47                 |                        |
| rs10072700             |           | C131844802A                       | 37                | 174 | 249 | 0.41             | 29                   | 174 | 256 | 1                | 0.41                 | 0.59                   |
| rs2070721              | IRF1      | G131853741T                       | 98                | 219 | 144 | 0.40             | 90                   | 227 | 141 | 1                | 0.80                 | 0.78                   |
| rs2548997              |           | G131863294A                       | 58                | 195 | 207 | 0.25             | 47                   | 208 | 203 | 0.60             | 0.70                 | 0.45                   |
| rs4143832              |           | T131890876G                       | 12                | 102 | 345 | 0.17             | 17                   | 126 | 316 | 0.33             | 0.03                 | 0.10                   |
| rs4705959              |           | C131893690T                       | 26                | 179 | 253 | 0.54             | 32                   | 159 | 268 | 0.21             | 0.65                 | 0.33                   |
| rs2706399              |           | A131895601G                       | 104               | 232 | 124 | 0.85             | 103                  | 242 | 107 | 0.16             | 0.46                 | 0.50                   |
| rs739719               |           | A131900764C                       | 6                 | 72  | 383 | 0.25             | 2                    | 71  | 385 | 0.76             | 0.48                 | 0.36                   |
| rs2069822              | IL5       | C131906781T                       | 0                 | 19  | 441 | 1                | 1                    | 15  | 442 | 0.14             | 0.75                 |                        |
| rs2069812              |           | A131907815G                       | 40                | 216 | 205 | 0.13             | 43                   | 194 | 220 | 1                | 0.50                 | 0.41                   |
| rs2897443              | RAD50     | T131957493G                       | 11                | 111 | 338 | 0.57             | 14                   | 137 | 308 | 0.88             | 0.04                 | 0.11                   |
| rs6884762              | RAD50     | T131966629C                       | 0                 | 15  | 446 | 1                | 0                    | 34  | 424 | 1                | 0.01                 |                        |
| rs17772583             | RAD50     | G131981409A                       | 27                | 180 | 253 | 0.54             | 30                   | 163 | 266 | 0.45             | 0.57                 | 0.52                   |
| rs2237060              | RAD50     | G131998784T                       | 93                | 234 | 134 | 0.64             | 87                   | 222 | 150 | 0.78             | 0.30                 | 0.49                   |
| rs2158177              | RAD50     | G132011957A                       | 8                 | 112 | 339 | 0.85             | 12                   | 133 | 314 | 0.74             | 0.06                 | 0.17                   |
| rs1800925 <sup>d</sup> |           | T132020708C                       | 11                | 112 | 338 | 0.58             | 14                   | 139 | 303 | 0.76             | 0.03                 | 0.08                   |
| rs20541 <sup>d</sup>   | IL13      | A132023863G                       | 6                 | 131 | 326 | 0.11             | 20                   | 140 | 298 | 0.46             | 0.02                 | 0.01                   |
| rs848 <sup>d</sup>     | IL13      | A132024399C                       | 6                 | 132 | 323 | 0.08             | 19                   | 145 | 294 | 0.88             | 0.01                 | 0.01                   |
| rs1295683              |           | A132026775G                       | 3                 | 78  | 380 | 1                | 6                    | 70  | 383 | 0.24             | 0.89                 | 0.49                   |
| rs2243297              |           | A132027070T                       | 0                 | 26  | 435 | 1                | 2                    | 34  | 423 | 0.18             | 0.12                 |                        |
| rs2243211              |           | A132029321C                       | 0                 | 54  | 406 | 0.39             | 5                    | 72  | 379 | 0.39             | 0.01                 |                        |
| rs762534               |           | A132032655C                       | 0                 | 47  | 414 | 0.62             | 3                    | 69  | 387 | 1                | 0.01                 |                        |
| rs2243248              |           | G132036543T                       | 3                 | 50  | 408 | 0.23             | 1                    | 71  | 387 | 0.34             | 0.11                 | 0.08                   |
| rs2227282              | IL4       | C132041078G                       | 18                | 173 | 270 | 0.15             | 45                   | 162 | 251 | 0.02             | 0.02                 | 0.00                   |
| rs2243263              | IL4       | C132041198G                       | 3                 | 84  | 373 | 0.60             | 9                    | 90  | 360 | 0.26             | 0.17                 | 0.17                   |
| rs12186803             | KIF3A     | A132067968G                       | 4                 | 103 | 353 | 0.38             | 15                   | 110 | 333 | 0.15             | 0.04                 | 0.02                   |
| rs10069772             | KIF3A     | A132068587G                       | 4                 | 90  | 362 | 0.81             | 11                   | 105 | 343 | 0.43             | 0.04                 | 0.08                   |
| rs17691077             | KIF3A     | C132071250A                       | 9                 | 102 | 349 | 0.68             | 7                    | 97  | 355 | 0.83             | 0.54                 | 0.81                   |

<sup>a</sup> Positions according to genomic contig NT\_034772.5 (Entrez Nucleotide). The minor allele is listed first, followed by the position in National Center for Biotechnology Information Genome Build 36.2 and then the major allele.

<sup>b</sup> Counts of genotype 11, 12 and 22.

<sup>c</sup> P-value from Hardy-Weinberg Equilibrium test.

<sup>d</sup> The data for these three SNPs were reported previously (21).

Supplemental Table 2. Minor allele frequencies and allele-based association of 5q31 SNPs with psoriasis

| RS Number  | Public    | Position and alleles <sup>a</sup> | Study | Case <sup>b</sup> |     |      |      |       |       | Control <sup>b</sup> |     |      |      |       |       | P <sup>c</sup> | OR (95%CI)       |
|------------|-----------|-----------------------------------|-------|-------------------|-----|------|------|-------|-------|----------------------|-----|------|------|-------|-------|----------------|------------------|
|            |           |                                   |       | 11                | 12  | 22   | Sum  | MAF   | HWE   | 11                   | 12  | 22   | Sum  | MAF   | HWE   |                |                  |
| rs11568506 | SLC22A4   | A131699359G                       | SS1   | 0                 | 12  | 449  | 461  | 0.013 | 1     | 0                    | 27  | 430  | 457  | 0.030 | 1     | 0.014          | 0.43 (0.21-0.86) |
|            |           |                                   | SS2   | 2                 | 18  | 473  | 493  | 0.022 | 0.02  | 0                    | 16  | 474  | 490  | 0.016 | 1     | 0.34           | 1.37 (0.71-2.63) |
|            |           |                                   | SS3   | 0                 | 16  | 465  | 481  | 0.017 | 1     | 0                    | 26  | 400  | 426  | 0.031 | 1     | 0.050          | 0.53 (0.28-1.00) |
|            |           |                                   | All   | 2                 | 46  | 1387 | 1435 | 0.017 |       | 0                    | 69  | 1304 | 1373 | 0.025 |       | 0.043          | 0.68 (0.47-0.99) |
| rs4143832  | LOC441108 | T131890876G                       | SS1   | 12                | 102 | 345  | 459  | 0.137 | 0.17  | 17                   | 126 | 316  | 459  | 0.174 | 0.33  | 0.029          | 0.75 (0.58-0.97) |
|            |           |                                   | SS2   | 11                | 151 | 331  | 493  | 0.175 | 0.22  | 21                   | 153 | 318  | 492  | 0.198 | 0.67  | 0.20           | 0.86 (0.68-1.08) |
|            |           |                                   | SS3   | 15                | 129 | 337  | 481  | 0.165 | 0.51  | 15                   | 117 | 294  | 426  | 0.173 | 0.40  | 0.68           | 0.94 (0.74-1.21) |
|            |           |                                   | All   | 38                | 382 | 1013 | 1433 | 0.160 |       | 53                   | 396 | 928  | 1377 | 0.182 |       | 0.026          | 0.85 (0.74-0.98) |
| rs2897443  | RAD50     | T131957493G                       | SS1   | 11                | 111 | 338  | 460  | 0.145 | 0.57  | 14                   | 137 | 308  | 459  | 0.180 | 0.88  | 0.041          | 0.77 (0.60-0.98) |
|            |           |                                   | SS2   | 9                 | 161 | 323  | 493  | 0.182 | 0.03  | 22                   | 154 | 316  | 492  | 0.201 | 0.57  | 0.27           | 0.88 (0.70-1.10) |
|            |           |                                   | SS3   | 14                | 124 | 344  | 482  | 0.158 | 0.49  | 22                   | 130 | 273  | 425  | 0.205 | 0.23  | 0.0092         | 0.72 (0.57-0.92) |
|            |           |                                   | All   | 34                | 396 | 1005 | 1435 | 0.162 |       | 58                   | 421 | 897  | 1376 | 0.195 |       | 0.0010         | 0.78 (0.69-0.91) |
| rs6884762  | RAD50     | T131966629C                       | SS1   | 0                 | 15  | 446  | 461  | 0.016 | 1     | 0                    | 34  | 424  | 458  | 0.037 | 1     | 0.0055         | 0.42 (0.23-0.79) |
|            |           |                                   | SS2   | 0                 | 30  | 463  | 493  | 0.030 | 1     | 0                    | 30  | 462  | 492  | 0.030 | 1     | 0.96           | 0.99 (0.59-1.66) |
|            |           |                                   | SS3   | 0                 | 16  | 466  | 482  | 0.017 | 1     | 0                    | 31  | 394  | 425  | 0.036 | 1     | 0.0078         | 0.44 (0.24-0.82) |
|            |           |                                   | All   | 0                 | 61  | 1375 | 1436 | 0.021 |       | 0                    | 95  | 1280 | 1375 | 0.035 |       | 0.0025         | 0.61 (0.44-0.84) |
| rs1800925  | IL13      | T132020708C                       | SS1   | 11                | 112 | 338  | 461  | 0.145 | 0.58  | 14                   | 139 | 303  | 456  | 0.183 | 0.76  | 0.029          | 0.76 (0.59-0.97) |
|            |           |                                   | SS2   | 9                 | 150 | 335  | 494  | 0.170 | 0.11  | 21                   | 158 | 316  | 495  | 0.202 | 0.78  | 0.068          | 0.81 (0.64-1.02) |
|            |           |                                   | SS3   | 16                | 119 | 345  | 480  | 0.157 | 0.17  | 21                   | 131 | 272  | 424  | 0.204 | 0.37  | 0.010          | 0.73 (0.57-0.93) |
|            |           |                                   | All   | 36                | 381 | 1018 | 1435 | 0.158 |       | 56                   | 428 | 891  | 1375 | 0.196 |       | 0.00015        | 0.77 (0.67-0.88) |
| rs20541    | IL13      | A132023863G                       | SS1   | 6                 | 131 | 326  | 463  | 0.154 | 0.11  | 20                   | 140 | 298  | 458  | 0.197 | 0.46  | 0.018          | 0.75 (0.59-0.95) |
|            |           |                                   | SS2   | 12                | 143 | 339  | 494  | 0.169 | 0.63  | 12                   | 170 | 312  | 494  | 0.196 | 0.047 | 0.12           | 0.83 (0.66-1.05) |
|            |           |                                   | SS3   | 8                 | 131 | 341  | 480  | 0.153 | 0.38  | 12                   | 138 | 272  | 422  | 0.192 | 0.35  | 0.029          | 0.76 (0.60-0.97) |
|            |           |                                   | All   | 26                | 405 | 1006 | 1437 | 0.159 |       | 44                   | 448 | 882  | 1374 | 0.195 |       | 0.00043        | 0.78 (0.68-0.90) |
| rs848      | IL13      | A132024399C                       | SS1   | 6                 | 132 | 323  | 461  | 0.156 | 0.076 | 19                   | 145 | 294  | 458  | 0.200 | 0.88  | 0.015          | 0.74 (0.58-0.94) |
|            |           |                                   | SS2   | 12                | 144 | 338  | 494  | 0.170 | 0.53  | 13                   | 171 | 308  | 492  | 0.200 | 0.067 | 0.085          | 0.82 (0.65-1.03) |
|            |           |                                   | SS3   | 8                 | 138 | 334  | 480  | 0.160 | 0.18  | 13                   | 141 | 269  | 423  | 0.197 | 0.36  | 0.040          | 0.78 (0.61-0.99) |
|            |           |                                   | All   | 26                | 414 | 995  | 1435 | 0.162 |       | 45                   | 457 | 871  | 1373 | 0.199 |       | 0.00035        | 0.78 (0.68-0.89) |
| rs2243211  |           | A132029321C                       | SS1   | 0                 | 54  | 406  | 460  | 0.059 | 0.39  | 5                    | 72  | 379  | 456  | 0.090 | 0.39  | 0.011          | 0.63 (0.44-0.90) |
|            |           |                                   | SS2   | 0                 | 51  | 441  | 492  | 0.052 | 0.63  | 3                    | 67  | 420  | 490  | 0.074 | 0.74  | 0.039          | 0.67 (0.46-0.98) |
|            |           |                                   | SS3   | 1                 | 64  | 416  | 481  | 0.069 | 0.72  | 2                    | 61  | 362  | 425  | 0.076 | 1     | 0.52           | 0.88 (0.62-1.26) |
|            |           |                                   | All   | 1                 | 169 | 1263 | 1433 | 0.060 |       | 10                   | 200 | 1161 | 1371 | 0.080 |       | 0.0024         | 0.72 (0.58-0.89) |
| rs762534   |           | A132032655C                       | SS1   | 0                 | 47  | 414  | 461  | 0.051 | 0.62  | 3                    | 69  | 387  | 459  | 0.082 | 1     | 0.0081         | 0.60 (0.41-0.87) |
|            |           |                                   | SS2   | 1                 | 54  | 437  | 492  | 0.057 | 1     | 4                    | 67  | 420  | 491  | 0.076 | 0.51  | 0.084          | 0.72 (0.51-1.04) |
|            |           |                                   | SS3   | 1                 | 48  | 433  | 482  | 0.052 | 1     | 1                    | 48  | 376  | 425  | 0.059 | 1     | 0.52           | 0.87 (0.58-1.31) |
|            |           |                                   | All   | 2                 | 149 | 1284 | 1435 | 0.053 |       | 8                    | 184 | 1183 | 1375 | 0.073 |       | 0.0031         | 0.72 (0.58-0.89) |
| rs2227282  | IL4       | C132041078G                       | SS1   | 18                | 173 | 270  | 461  | 0.227 | 0.15  | 45                   | 162 | 251  | 458  | 0.275 | 0.02  | 0.017          | 0.77 (0.62-0.95) |
|            |           |                                   | SS2   | 27                | 188 | 279  | 494  | 0.245 | 0.63  | 34                   | 193 | 265  | 492  | 0.265 | 1     | 0.30           | 0.89 (0.73-1.10) |
|            |           |                                   | SS3   | 31                | 143 | 306  | 480  | 0.214 | 0.01  | 31                   | 172 | 223  | 426  | 0.275 | 0.90  | 0.0024         | 0.71 (0.57-0.88) |
|            |           |                                   | All   | 76                | 504 | 855  | 1435 | 0.229 |       | 110                  | 527 | 739  | 1376 | 0.271 |       | 0.00022        | 0.79 (0.70-0.89) |
| rs12186803 | KIF3A     | A132067968G                       | SS1   | 4                 | 103 | 353  | 460  | 0.121 | 0.38  | 15                   | 110 | 333  | 458  | 0.153 | 0.15  | 0.045          | 0.76 (0.58-0.99) |
|            |           |                                   | SS2   | 10                | 111 | 373  | 494  | 0.133 | 0.56  | 7                    | 111 | 374  | 492  | 0.127 | 0.84  | 0.71           | 1.05 (0.80-1.36) |
|            |           |                                   | SS3   | 7                 | 86  | 389  | 482  | 0.104 | 0.33  | 12                   | 94  | 320  | 426  | 0.138 | 0.15  | 0.023          | 0.71 (0.54-0.95) |
|            |           |                                   | All   | 21                | 300 | 1115 | 1436 | 0.119 |       | 34                   | 315 | 1027 | 1376 | 0.139 |       | 0.027          | 0.83 (0.71-0.98) |
| rs10069772 | KIF3A     | A132068587G                       | SS1   | 4                 | 90  | 362  | 456  | 0.107 | 0.81  | 11                   | 105 | 343  | 459  | 0.138 | 0.43  | 0.044          | 0.74 (0.56-0.99) |
|            |           |                                   | SS2   | 10                | 99  | 381  | 490  | 0.121 | 0.29  | 11                   | 120 | 359  | 490  | 0.145 | 0.72  | 0.13           | 0.81 (0.62-1.05) |
|            |           |                                   | SS3   | 5                 | 101 | 372  | 478  | 0.116 | 0.66  | 6                    | 101 | 317  | 424  | 0.133 | 0.67  | 0.27           | 0.85 (0.64-1.13) |
|            |           |                                   | All   | 19                | 290 | 1115 | 1424 | 0.115 |       | 28                   | 326 | 1019 | 1373 | 0.139 |       | 0.0074         | 0.80 (0.68-0.94) |

<sup>a</sup> Positions according to genomic contig NT\_034772.5 (Entrez Nucleotide). The minor allele is listed first, followed by the position in National Center for Biotechnology Information Genome Build 36.2 and then the major allele.

<sup>b</sup> Counts for genotypes 11, 12 and 22; MAF: minor allele frequency; HWE: Hardy-Weinberg P-value

<sup>c</sup> P values and ORs are calculated by chi-square method for SS1, SS2 and SS3 and by Mantel-Haenszel method for the three sample sets combined (All); P-values for the three *IL13* markers in the combined sample sets are slightly different from our previous report which used Fisher's exact test (21).

Supplemental Table 3. LD measures of the twelve significant markers in controls of sample set 1

|       |                   | D'                |                  |                  |                  |                  |                |              |                  |                 |                  |                   |                   |
|-------|-------------------|-------------------|------------------|------------------|------------------|------------------|----------------|--------------|------------------|-----------------|------------------|-------------------|-------------------|
|       |                   | <i>rs11568506</i> | <i>rs4143832</i> | <i>rs2897443</i> | <i>rs6884762</i> | <i>rs1800925</i> | <i>rs20541</i> | <i>rs848</i> | <i>rs2243211</i> | <i>rs762534</i> | <i>rs2227282</i> | <i>rs12186803</i> | <i>rs10069772</i> |
| $r^2$ | <i>rs11568506</i> |                   | 0.394            | 0.467            | 0.04             | 0.953            | 0.996          | 0.997        | 1                | 1               | 0.349            | 0.408             | 0.993             |
|       | <i>rs4143832</i>  | 0.001             |                  | 0.721            | 0.918            | 0.747            | 0.296          | 0.3          | 0.378            | 0.465           | 0.349            | 0.24              | 0.097             |
|       | <i>rs2897443</i>  | 0.001             | 0.501            |                  | 1                | 0.908            | 0.525          | 0.524        | 0.628            | 0.646           | 0.34             | 0.231             | 0.123             |
|       | <i>rs6884762</i>  | 0.001             | 0.154            | 0.177            |                  | 1                | 0.56           | 0.556        | 0.549            | 0.555           | 0.557            | 0.987             | 0.505             |
|       | <i>rs1800925</i>  | <b>0.006</b>      | <b>0.517</b>     | <b>0.801</b>     | <b>0.174</b>     |                  | 0.552          | 0.55         | 0.778            | 0.735           | 0.316            | 0.21              | 0.148             |
|       | <i>rs20541</i>    | 0.007             | 0.075            | 0.245            | 0.05             | <b>0.278</b>     |                | 0.993        | 0.895            | 0.825           | 0.431            | 0.279             | 0.265             |
|       | <i>rs848</i>      | 0.008             | 0.076            | 0.241            | 0.048            | <b>0.273</b>     | 0.979          |              | 0.913            | 0.826           | 0.441            | 0.3               | 0.271             |
|       | <i>rs2243211</i>  | 0.003             | 0.067            | 0.177            | 0.121            | <b>0.263</b>     | 0.318          | 0.328        |                  | 0.805           | 0.175            | 0.855             | 0.344             |
|       | <i>rs762534</i>   | 0.003             | 0.091            | 0.169            | 0.133            | <b>0.212</b>     | 0.245          | 0.244        | 0.588            |                 | 0.26             | 1                 | 0.415             |
|       | <i>rs2227282</i>  | 0.01              | 0.067            | 0.066            | 0.031            | <b>0.059</b>     | 0.12           | 0.128        | 0.008            | 0.016           |                  | 0.956             | 0.849             |
|       | <i>rs12186803</i> | 0.027             | 0.049            | 0.044            | 0.007            | <b>0.035</b>     | 0.057          | 0.065        | 0.013            | 0.016           | 0.436            |                   | 0.999             |
|       | <i>rs10069772</i> | 0.005             | 0.007            | 0.011            | 0.061            | <b>0.016</b>     | 0.046          | 0.047        | 0.074            | 0.096           | 0.305            | 0.029             |                   |

Supplemental Table 4. Chr5q31 markers in high LD ( $r^2 > 0.80$ ) with rs1800925

| Marker     | Position (bp) | Gene Symbol | SNPType                    | $r^2$ with 1800925 |
|------------|---------------|-------------|----------------------------|--------------------|
| rs12652920 | 131,913,139   | IL5         | putative TFBS <sup>a</sup> | 0.895              |
| rs2706338  | 131,923,748   | RAD50       | Intron                     | 0.897              |
| rs2244012  | 131,929,124   | LOC441108   | Intron                     | 0.897              |
| rs2299015  | 131,929,396   | RAD50       | Intron                     | 0.877              |
| rs2706347  | 131,933,016   | RAD50       | putative TFBS <sup>a</sup> | 0.897              |
| rs2706348  | 131,933,709   | RAD50       | Intron                     | 0.897              |
| rs17166050 | 131,943,112   | RAD50       | putative TFBS <sup>a</sup> | 0.897              |
| rs2522403  | 131,943,216   | RAD50       | Intron                     | 0.897              |
| rs2246176  | 131,945,249   | RAD50       | Intron                     | 0.895              |
| rs2252775  | 131,946,343   | RAD50       | Intron                     | 0.897              |
| rs10463893 | 131,955,938   | RAD50       | Intron                     | 0.895              |
| rs2897443  | 131,957,493   | RAD50       | putative TFBS <sup>a</sup> | 0.897              |
| rs2706370  | 131,960,915   | RAD50       | Intron                     | 0.829              |
| rs2706372  | 131,963,376   | RAD50       | Intron                     | 0.89               |
| rs12187537 | 131,967,803   | RAD50       | Intron                     | 0.817              |
| rs2522394  | 131,972,028   | RAD50       | Intron                     | 0.897              |
| rs10520114 | 131,976,790   | RAD50       | Intron                     | 0.897              |
| rs2301713  | 131,979,895   | RAD50       | Intron                     | 0.892              |
| rs6596086  | 131,980,121   | RAD50       | Intron                     | 0.897              |
| rs2106984  | 131,980,965   | RAD50       | Intron                     | 0.897              |
| rs7449456  | 131,981,326   | RAD50       | Intron                     | 0.89               |
| rs3798135  | 131,993,008   | RAD50       | Intron                     | 0.897              |
| rs3798134  | 131,993,078   | RAD50       | Intron                     | 0.894              |
| rs6596087  | 131,996,508   | RAD50       | Intron                     | 0.881              |
| rs6871536  | 131,997,773   | RAD50       | Intron                     | 0.897              |
| rs12653750 | 131,999,801   | RAD50       | Intron                     | 0.897              |
| rs2040703  | 132,000,157   | RAD50       | Intron                     | 0.897              |
| rs2040704  | 132,001,076   | RAD50       | putative TFBS <sup>a</sup> | 0.897              |
| rs2074369  | 132,001,562   | RAD50       | Intron                     | 0.892              |
| rs7737470  | 132,001,962   | RAD50       | Intron                     | 0.897              |
| rs2240032  | 132,005,026   | RAD50       | Intron                     | 0.892              |
| rs3091307  | 132,017,035   |             | Intron                     | 0.897              |

<sup>a</sup> Putative TFBS (transcription factor binding site).

Supplemental Table 5. Pairwise genotype counts for cases and controls

| rs11568506 | rs1800925 | Cases N | Controls N |
|------------|-----------|---------|------------|
| GG         | CC        | 978     | 831        |
| GG         | CT        | 370     | 414        |
| AG         | CC        | 38      | 52         |
| GG         | TT        | 35      | 56         |
| AG         | CT        | 7       | 16         |
| AA         | CC        | 2       |            |
| AG         | TT        | 1       |            |
